# Supplementary material for: Vegetarian Diets: Planetary Health and Its Alignment with Human Health
Source: PubMed Central journal article supplement — Adv Nutr. 2019 Nov 15;10(Suppl 4):S380–8. doi: 10.1093/advances/nmz019 (PMC6855976; doi:10.1093/advances/nmz019), 2019-11-15
Supplement: nmz019_supplemental_table_1.pdf [file nmz019_supplemental_table_1.pdf]

**Supplemental Table 1.** Relative difference (in percentage) of greenhouse gas (GHG) emissions, land use and water use by shifting from current dietary patterns to vegetarian diets.

| Study (reference)             | Type of vegetarian diet | Relative difference (%) |          |           |
|-------------------------------|-------------------------|-------------------------|----------|-----------|
|                               |                         | GHG emission            | Land use | Water use |
| Springmann et al. 2018 (8)    | Ovolactovegetarian      | -82                     | -31      | -7        |
|                               | Vegan                   | -89                     | -36      | 1         |
|                               | Vegan                   | -87                     | -29      | 33        |
| Rosi et al. 2017 (30)         | Ovolactovegetarian      | -34                     | -38      | -27       |
|                               | Vegan                   | -41                     | -44      | -22       |
| Abeliotis et al. 2016 (31)    | Ovolactovegetarian      | -37                     | --       | --        |
| Bryngelsson et al. 2016 (32)  | Ovolactovegetarian      | -36                     | -46      | --        |
|                               | Vegan                   | -72                     | -80      | --        |
| Davis et al. 2016 (33)        | Ovolactovegetarian      | -46                     | -74      | -28       |
| Goldstein et al. 2016 (34)    | Ovolactovegetarian      | -46                     | -67      | --        |
|                               | Vegan                   | -60                     | -78      | --        |
| Jalava et al. 2016 (56)       | Ovolactovegetarian      | --                      | --       | -16       |
| Springmann et al. 2016 (35)   | Ovolactovegetarian      | -58                     | --       | --        |
|                               | Vegan                   | -67                     | --       | --        |
| Vanham et al. 2016 (57)       | Ovolactovegetarian      | --                      | --       | -49       |
| Grabs 2015 (36)               | Ovolactovegetarian      | -20                     | --       | --        |
| Heller and Keoleian 2015 (40) | Ovolactovegetarian      | -33                     | --       | --        |
|                               | Vegan                   | -53                     | --       | --        |
| Pairotti et al 2015 (37)      | Ovolactovegetarian      | -13                     | --       | --        |
| Sabate et al. 2015 (38)       | Ovolactovegetarian      | -28                     | --       | --        |
|                               | Vegan                   | -42                     | --       | --        |
| Stamm 2015 (39)               | Ovolactovegetarian      | -17                     | --       | --        |
|                               | Vegan                   | -39                     | --       | --        |
| Jalava et al. 2014 (58)       | Ovolactovegetarian      | --                      | --       | -22       |
| Meier et al. 2014 (53)        | Ovolactovegetarian      | --                      | -28      | --        |
|                               | Vegan                   | --                      | -44      | --        |
| Scarborough et al. 2014 (41)  | Ovolactovegetarian      | -35                     | --       | --        |
|                               | Vegan                   | -50                     | --       | --        |
| Soret et al. 2014 (42)        | Ovolactovegetarian      | -29                     | --       | --        |
| Tilman and Clark 2014 (12)    | Ovolactovegetarian      | -55                     | -28      | --        |
| Tyszler et al. 2014 (52)      | Vegan                   | --                      | -40      | --        |
| Van Dooren et al. 2014 (43)   | Ovolactovegetarian      | -22                     | -51      | --        |
|                               | Vegan                   | -35                     | -59      | --        |

**Supplemental Table 1.** (Continued)

| Study (reference number)        | Type of vegetarian diet | Relative difference (%) |          |           |
|---------------------------------|-------------------------|-------------------------|----------|-----------|
|                                 |                         | GHG emission            | Land use | Water use |
| Werner et al. 2014 (44)         | Ovolactovegetarian      | -34                     | --       | --        |
|                                 | Vegan                   | -48                     | --       | --        |
| da Silva et al. 2013 (59)       | Ovolactovegetarian      | --                      | --       | -43       |
| Hoolohan et al. 2013 (45)       | Ovolactovegetarian      | -35                     | --       | --        |
| Meier and Christen 2013 (46)    | Ovolactovegetarian      | -24                     | -27      | 85        |
|                                 | Vegan                   | -53                     | -50      | 107       |
| Temme et al. 2013 (54)          | Vegan                   | --                      | -51      | --        |
| Vanham 2013 (61)                | Ovolactovegetarian      | --                      | --       | -37       |
| Vanham et al. 2013 (60)         | Ovolactovegetarian      | --                      | --       | -38       |
| Wilson et al. 2013 (47)         | Ovolactovegetarian      | -73                     | --       | --        |
|                                 |                         | -74                     | --       | --        |
|                                 |                         | -78                     | --       | --        |
|                                 |                         | -57                     | --       | --        |
|                                 |                         | -83                     | --       | --        |
|                                 |                         | -85                     | --       | --        |
|                                 | Vegan                   | -81                     | --       | --        |
| Berners-Lee et al. 2012 (48)    | Ovolactovegetarian      | -22                     | --       | --        |
|                                 |                         | -18                     | --       | --        |
|                                 |                         | -25                     | --       | --        |
|                                 | Vegan                   | -31                     | --       | --        |
|                                 |                         | -23                     | --       | --        |
|                                 |                         | -25                     | --       | --        |
| Audsley et al. 2009 (49)        | Ovolactovegetarian      | -40                     | --       | --        |
| Risku-Norja et al. 2009 (51)    | Vegan                   | -48                     | --       | --        |
| Risku-Norja et al. 2008 (50)    | Vegan                   | -61                     | -49      | --        |
| Peters et al. 2007 (55)         | Ovolactovegetarian      | --                      | -55      | --        |
| Renault and Wallender 2000 (62) | Ovolactovegetarian      | --                      | --       | -52       |

--:no reported data. GHG: greenhouse gas

Note: Relative differences were directly obtained from the publications, or estimated from data reported in them.
